# Supplementary material
Source: publisher figshare collection journal article supplement (https://sage.figshare.com/ndownloader/files/16832354)
Supplement: Supplementary file 1 [file 16832354]

## Annex: EU Documents Freedom of Movement

| Document nr.  | Title                                                                                                                                                                                                                                                                                                                                                                                                                                                                                                                                                                                                                                                    | Author     | Date       |
|---------------|----------------------------------------------------------------------------------------------------------------------------------------------------------------------------------------------------------------------------------------------------------------------------------------------------------------------------------------------------------------------------------------------------------------------------------------------------------------------------------------------------------------------------------------------------------------------------------------------------------------------------------------------------------|------------|------------|
| MEMO/04/24    | Free movement of workers after enlargement                                                                                                                                                                                                                                                                                                                                                                                                                                                                                                                                                                                                               | Commission | 05/02/2004 |
| COM(2004)596  | Proposal for a COUNCIL DECISION on the signature, on behalf of the European Community and its Member States, of a Protocol to the Agreement between the European Community and its Member States, of the one part and the Swiss Confederation, of the other, on the free movement of Persons, regarding the participation, as contracting parties, of the Czech Republic, the Republic of Estonia, the Republic of Cyprus, the Republic of Latvia, the Republic of Lithuania the Republic of Hungary, the Republic of Malta, the Republic of Poland, the Republic of Slovenia and the Slovak Republic, pursuant to their accession to the European Union | Commission | 16/09/2004 |
| MEMO/05/229   | 2006 – European Year of Workers' Mobility, the importance of the mobility of workers to the implementation of the Lisbon strategy                                                                                                                                                                                                                                                                                                                                                                                                                                                                                                                        | Commission | 30/06/2005 |
| MEMO/06/64    | FAQ on the Commission's free movement of workers report                                                                                                                                                                                                                                                                                                                                                                                                                                                                                                                                                                                                  | Commission | 08/02/2006 |
| IP/06/186     | European year of workers' mobility kicks off with one million jobs online                                                                                                                                                                                                                                                                                                                                                                                                                                                                                                                                                                                | Commission | 20/02/2006 |
| SPEECH/06/109 | 2006 European Year of Workers' Mobility                                                                                                                                                                                                                                                                                                                                                                                                                                                                                                                                                                                                                  | Commission | 20/02/2006 |
| IP/06/554     | Enhancement of free movement and residence rights for EU citizens: a new milestone in EU integration process                                                                                                                                                                                                                                                                                                                                                                                                                                                                                                                                             | Commission | 02/05/2006 |
| MEMO/06/179   | The Directive on the right to move and reside freely in the Union / Seven million European citizens already live in another Member State                                                                                                                                                                                                                                                                                                                                                                                                                                                                                                                 | Commission | 02/05/2006 |
| MEMO/06/513   | Free movement of workers after accession of Bulgaria and Romania: Frequently Asked Questions                                                                                                                                                                                                                                                                                                                                                                                                                                                                                                                                                             | Commission | 21/12/2006 |
| COM(2007)498  | COMMUNICATION FROM THE COMMISSION TO THE EUROPEAN PARLIAMENT, THE COUNCIL, THE EUROPEAN ECONOMIC AND SOCIAL COMMITTEE AND THE COMMITTEE OF THE REGIONS Promoting young people's full participation in education, employment and society                                                                                                                                                                                                                                                                                                                                                                                                                  | Commission | 05/09/2007 |
| IP/07/1461    | Pension proposal on track to improve workers' mobility                                                                                                                                                                                                                                                                                                                                                                                                                                                                                                                                                                                                   | Commission | 09/10/2007 |
| COM(2007)773  | COMMUNICATION FROM THE COMMISSION TO THE COUNCIL, THE EUROPEAN PARLIAMENT, THE EUROPEAN ECONOMIC AND SOCIAL COMMITTEE AND THE COMMITTEE OF THE REGIONS Modernising social protection for greater social justice and economic cohesion: taking forward the active inclusion of people furthest from the labour market                                                                                                                                                                                                                                                                                                                                     | Commission | 06/12/2007 |
| MEMO/08/91    | European Commission adopts its 5th Report on European Union Citizenship                                                                                                                                                                                                                                                                                                                                                                                                                                                                                                                                                                                  | Commission | 15/02/2008 |
| COM(2008)765  | COMMUNICATION FROM THE COMMISSION TO THE EUROPEAN PARLIAMENT, THE COUNCIL, THE EUROPEAN ECONOMIC AND SOCIAL COMMITTEE AND THE COMMITTEE OF THE REGIONS The impact of free movement of workers in the context of EU enlargement Report on the first phase (1 January 2007 – 31 December 2008) of the Transitional Arrangements set out in the 2005 Accession Treaty and as requested according to the Transitional Arrangement set out in the 2003 Accession Treaty                                                                                                                                                                                       | Commission | 18/11/2008 |
| MEMO/08/718   | Commission report on transitional arrangements regarding free movement of workers                                                                                                                                                                                                                                                                                                                                                                                                                                                                                                                                                                        | Commission | 18/11/2008 |

|               |                                                                                                                                                                                                                                                                                              |            |            |
|---------------|----------------------------------------------------------------------------------------------------------------------------------------------------------------------------------------------------------------------------------------------------------------------------------------------|------------|------------|
| COM(2009)313  | COMMUNICATION FROM THE COMMISSION TO THE EUROPEAN PARLIAMENT AND THE COUNCIL on Guidance for Better Transposition and Application of Directive 2004/38/EC on the Right of Citizens of the Union and their Family Members to Move and Reside Freely within the Territory of the Member States | Commission | 02/07/2009 |
| MEMO/09/311   | Guidelines on free movement and residence rights of EU citizens and their families                                                                                                                                                                                                           | Commission | 02/07/2009 |
| MEMO/10/159   | Modernised social security: supporting mobility in the EU                                                                                                                                                                                                                                    | Commission | 30/04/2010 |
| COM(2010)204  | Proposal for a REGULATION OF THE EUROPEAN PARLIAMENT AND OF THE COUNCIL on freedom of movement for workers within the Union                                                                                                                                                                  | Commission | 05/05/2010 |
| MEMO/10/251   | Statement of the European Commissioner for Home Affairs, Cecilia Malmström, on the 25th Anniversary of Schengen: "Twenty-five years of removing borders"                                                                                                                                     | Commission | 11/06/2010 |
| MEMO/10/322   | Free movement rights for workers and Eurobarometer survey on labour mobility                                                                                                                                                                                                                 | Commission | 12/07/2010 |
| COM(2010)373  | COMMUNICATION FROM THE COMMISSION TO THE COUNCIL, THE EUROPEAN PARLIAMENT, THE EUROPEAN ECONOMIC AND SOCIAL COMMITTEE AND THE COMMITTEE OF THE REGIONS Reaffirming the free movement of workers: rights and major developments                                                               | Commission | 13/07/2010 |
| COM(2010)603  | EU CITIZENSHIP REPORT 2010 Dismantling the 2010. Dismantling the Obstacles to EU Citizens' Rights                                                                                                                                                                                            | Commission | 27/10/2010 |
| COM/2010/602  | REPORT FROM THE COMMISSION TO THE EUROPEAN PARLIAMENT, THE COUNCIL AND THE EUROPEAN ECONOMIC AND SOCIAL COMMITTEE On progress towards effective EU Citizenship 2007-2010                                                                                                                     | Commission | 27/10/2010 |
| IP/10/1390    | European Commission sets out plans to strengthen the Single Market with measures to boost growth and enhance citizens' rights                                                                                                                                                                | Commission | 27/10/2010 |
| SPEECH/11/125 | Mr. László ANDOR EU Commissioner responsible for Employment, Social Affairs and Inclusion, "The free movement of workers – an opportunity for all"                                                                                                                                           | Commission | 25/02/2011 |
| MEMO/11/259   | Frequently asked questions: The end of transitional arrangements for the free movement of workers on 30 April 2011                                                                                                                                                                           | Commission | 28/04/2011 |
| SPEECH/11/478 | Mr. László ANDOR EU Commissioner responsible for Employment, Social Affairs and Inclusion, "Balancing economic integration and social protection"                                                                                                                                            | Commission | 27/06/2011 |
| COM(2011)5896 | COMMISSION DECISION of 11.8.2011 authorising Spain to temporarily suspend the application of Articles 1 to 6 of Regulation (EU) No 492/2011 of the European Parliament and of the Council on freedom of movement for workers within the Union with regard to Romanian workers                | Commission | 11/08/2011 |
| IP/11/960     | The Commission accepts that Spain can temporarily restrict the free movement of Romanian workers                                                                                                                                                                                             | Commission | 11/08/2011 |
| MEMO/11/554   | The Commission accepts that Spain can temporarily restrict the free movement of Romanian workers                                                                                                                                                                                             | Commission | 11/08/2011 |
| IP/11/981     | Free movement: Determined Commission action has helped resolve 90% of open free movement cases                                                                                                                                                                                               | Commission | 25/08/2011 |
| IP/11/1036    | Schengen: EU Commission proposes a European approach to better protect citizens' free movement                                                                                                                                                                                               | Commission | 16/09/2011 |
| MEMO/11/606   | Frequently Asked Questions: Schengen strengthening the area without internal border controls to guarantee free movement                                                                                                                                                                      | Commission | 16/09/2011 |
| SPEECH/11/585 | Strengthening the area without internal border controls to guarantee free movement                                                                                                                                                                                                           | Commission | 16/09/2011 |

|                |                                                                                                                                                                                                                                                                                                                                                                                                                                                                                                       |            |            |
|----------------|-------------------------------------------------------------------------------------------------------------------------------------------------------------------------------------------------------------------------------------------------------------------------------------------------------------------------------------------------------------------------------------------------------------------------------------------------------------------------------------------------------|------------|------------|
| SPEECH/11/695  | Mr. László ANDOR, EU Commissioner responsible for Employment, Social Affairs and Inclusion, "Building a social market economy in the European Union"                                                                                                                                                                                                                                                                                                                                                  | Commission | 20/10/2011 |
| COM(2011)729   | REPORT FROM THE COMMISSION TO THE COUNCIL on the Functioning of the Transitional Arrangements on Free Movement of Workers from Bulgaria and Romania                                                                                                                                                                                                                                                                                                                                                   | Commission | 11/11/2011 |
| MEMO/11/773    | Commission report on transitional arrangements regarding free movement of workers from Bulgaria and Romania                                                                                                                                                                                                                                                                                                                                                                                           | Commission | 11/11/2011 |
| COM(2011)832   | COMMUNICATION FROM THE COMMISSION TO THE EUROPEAN PARLIAMENT pursuant to Article 294(6) of the Treaty on the Functioning of the European Union concerning the Position of the Council on the adoption of a Directive of the European Parliament and of the Council on a single application procedure for a single permit for third-country nationals to reside and work in the territory of a Member State and on a common set of rights for third-country workers legally residing in a Member State | Commission | 25/11/2011 |
| SPEECH/12/314  | László Andor Commissioner for Employment, Social Affairs and Inclusion, Towards a jobs-centred approach to economic policy                                                                                                                                                                                                                                                                                                                                                                            | Commission | 02/05/2012 |
| SPEECH/12/588  | László Andor Commissioner for Employment, Social Affairs and Inclusion, A strong employment agenda – the pathway to economic recovery                                                                                                                                                                                                                                                                                                                                                                 | Commission | 06/09/2012 |
| MEMO/12/896    | Employment: how the EURES jobseeker mobility network works                                                                                                                                                                                                                                                                                                                                                                                                                                            | Commission | 26/11/2012 |
| MEMO/12/897    | Employment: Commission improves EURES jobseeker mobility network – frequently asked questions                                                                                                                                                                                                                                                                                                                                                                                                         | Commission | 26/11/2012 |
| IP/12/1388     | Austria and Belgium given more time to justify quotas                                                                                                                                                                                                                                                                                                                                                                                                                                                 | Commission | 18/12/2012 |
| IP/12/1440     | Commission authorises Spain to extend existing temporary restrictions on Romanian workers                                                                                                                                                                                                                                                                                                                                                                                                             | Commission | 21/12/2012 |
| COM(2013)228   | Proposal for a REGULATION OF THE EUROPEAN PARLIAMENT AND OF THE COUNCIL on promoting the free movement of citizens and businesses by simplifying the acceptance of certain public documents in the European Union and amending Regulation (EU) No 1024/2012                                                                                                                                                                                                                                           | Commission | 24/04/2013 |
| COM(2013)236   | Proposal for a DIRECTIVE OF THE EUROPEAN PARLIAMENT AND OF THE COUNCIL on measures facilitating the exercise of rights conferred on workers in the context of freedom of movement for workers                                                                                                                                                                                                                                                                                                         | Commission | 26/04/2013 |
| SPEECH/13/3723 | László ANDOR European Commissioner responsible for Employment, Social Affairs and Inclusion, Free movement of workers – good for people, good for the economy                                                                                                                                                                                                                                                                                                                                         | Commission | 26/04/2013 |
| SPEECH/13/472  | László Andor EU Commissioner for Employment, Social Affairs and Inclusion, Building a single European labour market must be part of the EU's recovery strategy                                                                                                                                                                                                                                                                                                                                        | Commission | 28/05/2013 |
| IP/13/496      | Commission reports on EU free movement                                                                                                                                                                                                                                                                                                                                                                                                                                                                | Commission | 03/06/2013 |
| MEMO/13/536    | New Schengen rules to better protect citizens' free movement                                                                                                                                                                                                                                                                                                                                                                                                                                          | Commission | 12/06/2013 |
| MEMO/13/587    | Pensions: Commission welcomes Council agreement on pension portability to facilitate EU worker mobility                                                                                                                                                                                                                                                                                                                                                                                               | Commission | 20/06/2013 |
| SPEECH/13/789  | Viviane Reding Vice-President of the European Commission, EU Commissioner for Justice Free movement: Vice-President Reding's intervention at the Justice and Home Affairs Council                                                                                                                                                                                                                                                                                                                     | Commission | 08/10/2013 |
| IP/13/1151     | Free movement of people: five actions to citizens, growth and employment in the EU                                                                                                                                                                                                                                                                                                                                                                                                                    | Commission | 25/11/2013 |
| MEMO/13/1041   | European Commission upholds free movement of people                                                                                                                                                                                                                                                                                                                                                                                                                                                   | Commission | 25/11/2013 |

|                |                                                                                                                                                                                                                                           |            |            |
|----------------|-------------------------------------------------------------------------------------------------------------------------------------------------------------------------------------------------------------------------------------------|------------|------------|
| COM(2013)837   | COMMUNICATION FROM THE COMMISSION TO THE EUROPEAN PARLIAMENT, THE COUNCIL, THE EUROPEAN ECONOMIC AND SOCIAL COMMITTEE AND THE COMMITTEE OF THE REGIONS Free movement of EU citizens and their families: Five actions to make a difference | Commission | 25/11/2013 |
| MEMO/13/1104   | Council of Employment, Social Policy and Health Ministers, 9-10 December 2013, Brussels                                                                                                                                                   | Commission | 06/12/2013 |
| SPEECH/14/21   | László ANDOR European Commissioner responsible for Employment, Social Affairs and Inclusion Free movement of workers                                                                                                                      | Commission | 15/01/2014 |
| COM(2014)6     | Proposal for a REGULATION OF THE EUROPEAN PARLIAMENT AND OF THE COUNCIL on a European network of Employment Services, workers' access to mobility services and the further integration of labour markets"                                 | Commission | 17/01/2014 |
| IP/14/98       | Free Movement: European Commission invites Mayors to discuss challenges and exchange best practices                                                                                                                                       | Commission | 04/02/2014 |
| SPEECH/14/115  | László ANDOR European Commissioner responsible for Employment, Social Affairs and Inclusion Labour Mobility in the European Union – The Inconvenient Truth                                                                                | Commission | 10/02/2014 |
| SPEECH/14/123  | Viviane Reding Vice-President of the European Commission, Justice Commissioner Free movement of EU citizens: turning challenges into opportunities at local level                                                                         | Commission | 11/02/2014 |
| SPEECH/14/227  | László ANDOR European Commissioner responsible for Employment, Social Affairs and Inclusion Social dimension of the Internal Market                                                                                                       | Commission | 18/03/2014 |
| SPEECH/14/263  | László Andor European Commissioner responsible for Employment, Social Affairs and Inclusion The Europe 2020 Strategy beyond the crisis                                                                                                    | Commission | 31/03/2014 |
| MEMO/14/288    | Free movement of workers: Commission improves the application of worker's rights – frequently asked question                                                                                                                              | Commission | 14/04/2014 |
| SPEECH/14/366  | László Andor Commissioner for Employment, Social Affairs and Inclusion The European way                                                                                                                                                   | Commission | 13/05/2014 |
| SPEECH/14/471  | László Andor European Commissioner for Employment, Social Affairs and Inclusion Tackling the EU's social deficit                                                                                                                          | Commission | 17/06/2014 |
| SPEECH/14/491  | László Andor European Commissioner for Employment, Social Affairs and Inclusion Labour mobility in the EU: challenges and perspectives for a genuine European labour market                                                               | Commission | 24/06/2014 |
| MEMO/14/541    | Labour Mobility within the EU                                                                                                                                                                                                             | Commission | 25/09/2014 |
| SPEECH/14/622  | László Andor Commissioner for Employment, Social Affairs and Inclusion, Labour mobility in the EU                                                                                                                                         | Commission | 25/09/2014 |
| IP/14/1049     | Fighting abuse of EU citizens' right to free movement: Commission helps Member States tackle marriages of convenience                                                                                                                     | Commission | 26/09/2014 |
| SPEECH/14/664  | László Andor European Commissioner for Employment, Social Affairs and Inclusion Implementing the Youth Guarantee                                                                                                                          | Commission | 06/10/2014 |
| SPEECH/15/4841 | Intervention of Commissioner Marianne Thyssen at 3rd Labour Mobility Congress                                                                                                                                                             | Commission | 02/04/2015 |
| COM(2015)233   | REPORT FROM THE COMMISSION TO THE COUNCIL on the Functioning of the Transitional Arrangements on Free Movement of Workers from Croatia (First phase: 1 July 2013 - 30 June 2015)                                                          | Commission | 29/05/2015 |
| MEMO/15/5068   | Commission report on transitional arrangements regarding free movement of workers from Croatia                                                                                                                                            | Commission | 29/05/2015 |
| SPEECH/15/5787 | College read-out: Vice-President Dombrovskis on orientation debate on labour mobility and social rights Strasbourg                                                                                                                        | Commission | 06/10/2015 |
| SPEECH/15/6074 | Speech by Commissioner Marianne Thyssen on Europe's vision for fair labour mobility Dublin                                                                                                                                                | Commission | 13/11/2015 |

|                       |                                                                                                                                                                                                                                              |                      |            |
|-----------------------|----------------------------------------------------------------------------------------------------------------------------------------------------------------------------------------------------------------------------------------------|----------------------|------------|
| STATEMENT/16/4<br>273 | Systematic checks of EU citizens at external borders agreed by European Parliament and Council Brussels                                                                                                                                      | Commission           | 05/12/2016 |
| SPEECH/16/4326        | Remarks by Commissioner Avramopoulos at the press conference on the state of play of progress under the European Agenda on Migration and the presentation of the action plan on travel document security                                     | Commission           | 08/12/2016 |
| IP/16/4301            | Fairness at the heart of Commission's proposal to update EU rules on social security coordination Brussels                                                                                                                                   | Commission           | 13/12/2016 |
| SPEECH/16/4368        | Commissioner Thyssen on the Commission's proposal to revise the coordination of social security systems Strasbourg                                                                                                                           | Commission           | 13/12/2016 |
| IP/16/4501            | European Commission welcomes progress in relations between the European Union and Switzerland Brussels                                                                                                                                       | Commission           | 22/12/2016 |
| ST_12241_2004         | Draft Council Conclusions on International aspects of student support                                                                                                                                                                        | Council of<br>the EU | 09/09/2004 |
| ST_14604_2005         | Communication from the Commission to the Council, the European Parliament, the European Economic and Social Committee and the Committee of the Regions -More Research and Innovation -Investing for Growth and Employment: A Common Approach | Council of<br>the EU | 21/11/2005 |
| ST_10212_2008         | Council conclusions on Family-Friendly Scientific Careers: towards an Integrated Model                                                                                                                                                       | Council of<br>the EU | 03/06/2008 |
| ST_10091_2008         | Anticipating and matching labour market needs, with special emphasis on youth – A Jobs and Skills Initiative                                                                                                                                 | Council of<br>the EU | 04/06/2008 |
| ST_13671_2008         | Council conclusions on better careers and more mobility: a European partnership for researchers                                                                                                                                              | Council of<br>the EU | 30/09/2008 |
| ST_14857_2008         | Draft conclusions of the Council and of the Representatives of the Governments of the Member States, meeting within the Council on 20 and 21 November 2008, on youth mobility                                                                | Council of<br>the EU | 03/11/2008 |
| ST_15903_2008         | Free movement of persons: abuses and substantive problems                                                                                                                                                                                    | Council of<br>the EU | 18/11/2008 |
| ST_16206_2008         | Conclusions of the Council and of the Representatives of the Governments of the Member States, meeting within the Council on 20 and 21 November 2008, on youth mobility                                                                      | Council of<br>the EU | 21/11/2008 |
| ST_16483_2008         | Free movement of persons: abuses and substantive problems–Council conclusions on abuses and misuses of the right to free movement of persons                                                                                                 | Council of<br>the EU | 28/11/2008 |
| ST_16651_2008         | Draft Council conclusions on EU relations with EFTA countries                                                                                                                                                                                | Council of<br>the EU | 02/12/2008 |
| ST_16767_2008         | Council conclusions on the definition of a "2020 Vision for the European Research Area"                                                                                                                                                      | Council of<br>the EU | 09/12/2008 |
| ST_5833_2009          | Draft Council Conclusions on the professional and geographical mobility of the workforce and the free movement of workers within the European Union                                                                                          | Council of<br>the EU | 18/01/2009 |
| ST_6480_2009          | Draft council conclusions on the professional and geographical mobility of the workforce and the free movement of workers within the European Union                                                                                          | Council of<br>the EU | 23/02/2009 |
| ST_8826_2009          | Flexicurity in times of crisis                                                                                                                                                                                                               | Council of<br>the EU | 17/04/2009 |

|               |                                                                                                                                                                                                                                                                                                                                                     |                   |            |
|---------------|-----------------------------------------------------------------------------------------------------------------------------------------------------------------------------------------------------------------------------------------------------------------------------------------------------------------------------------------------------|-------------------|------------|
| ST_8984_2009  | Strategic framework for European cooperation in education and training ("ET2020")                                                                                                                                                                                                                                                                   | Council of the EU | 30/04/2009 |
| ST_9618_2009  | Preparation of the Competitiveness Council of 28 and 29 May 2009 The first steps towards the realisation of the European Research Area Vision 2020                                                                                                                                                                                                  | Council of the EU | 11/05/2009 |
| ST_9876_2009  | Conclusions of the Council and the Representatives of the Governments of the Member States, meeting within the Council, of 12 May 2009 on enhancing partnerships between education and training institutions and social partners, in particular employers, in the context of lifelong learning                                                      | Council of the EU | 15/05/2009 |
| ST_10612_2009 | Council conclusions on the Research Infrastructures and the regional dimension of the European Research Area (ERA)                                                                                                                                                                                                                                  | Council of the EU | 04/06/2009 |
| ST_16214_2009 | Promoting labour market inclusion – Recovering from the crisis and preparing for the post-2010 Lisbon Agenda                                                                                                                                                                                                                                        | Council of the EU | 20/11/2009 |
| ST_16112_2009 | Priorities for the Internal Market in the next decade – contribution by the Competitiveness Council to the post 2010 Lisbon agenda                                                                                                                                                                                                                  | Council of the EU | 24/11/2009 |
| ST_6833_2010  | Council conclusions on "European researchers" mobility and careers                                                                                                                                                                                                                                                                                  | Council of the EU | 09/03/2010 |
| ST_8309_2010  | Draft Council conclusions on the exchange programme for police by Erasmus                                                                                                                                                                                                                                                                           | Council of the EU | 13/04/2010 |
| ST_8797_2010  | The social dimension of education and training                                                                                                                                                                                                                                                                                                      | Council of the EU | 29/04/2010 |
| ST_9183_2010  | New Skills for New Jobs: the way forward                                                                                                                                                                                                                                                                                                            | Council of the EU | 07/05/2010 |
| ST_8436_2010  | Follow-up to the recommendations in the final report on the fourth round of mutual evaluations, concerning the European arrest warrant, during the Spanish Presidency of the Council of the European Union                                                                                                                                          | Council of the EU | 28/05/2010 |
| ST_15276_2010 | Draft Council conclusions on the Youth on the Move initiative – an integrated approach in response to the challenges young people face                                                                                                                                                                                                              | Council of the EU | 22/10/2010 |
| ST_15875_2010 | Draft Council Conclusions on the fight against crimes committed by mobile (itinerant) criminal groups                                                                                                                                                                                                                                               | Council of the EU | 05/11/2010 |
| ST_16336_2010 | COMMISSION STAFF WORKING DOCUMENT Accompanying the COMMUNICATION FROM THE COMMISSION TO THE EUROPEAN PARLIAMENT, THE COUNCIL, THE EUROPEAN ECONOMIC AND SOCIAL COMMITTEE, THE COMMITTEE OF THE REGIONS AND THE EUROPEAN INVESTMENT BANK Conclusions of the fifth report on economic, social and territorial cohesion: the future of cohesion policy | Council of the EU | 15/11/2010 |
| ST_17799_2010 | Council Conclusions on the Single Market Act                                                                                                                                                                                                                                                                                                        | Council of the EU | 10/12/2010 |
| ST_9058_2011  | Council conclusions on mobility information services for artists and for culture professionals                                                                                                                                                                                                                                                      | Council of the EU | 19/04/2011 |

|               |                                                                                                                                                                                                                                                                    |                   |            |
|---------------|--------------------------------------------------------------------------------------------------------------------------------------------------------------------------------------------------------------------------------------------------------------------|-------------------|------------|
| ST_10659_2011 | Communication from the Commission to the European Parliament, the Council, the Economic and Social Committee and the Committee of the Regions: Single Market Act - Twelve levers to boost growth and strengthen confidence "Working together to create new growth" | Council of the EU | 26/05/2011 |
| ST_10993_2011 | Council Conclusions on the Priorities for Relaunching the Single Market                                                                                                                                                                                            | Council of the EU | 31/05/2011 |
| ST_11838_2011 | Promoting Youth Employment to achieve the Europe 2020 objectives                                                                                                                                                                                                   | Council of the EU | 20/06/2011 |
| ST_16046_2011 | Draft Council conclusions on the modernisation of higher education                                                                                                                                                                                                 | Council of the EU | 09/11/2011 |
| ST_16744_2011 | Draft Council conclusions on language competences to enhance mobility                                                                                                                                                                                              | Council of the EU | 17/11/2011 |
| ST_16978_2011 | Draft Council Conclusions on the results of the Single Market Forum – Exchange of views – Adoption of Council Conclusions                                                                                                                                          | Council of the EU | 29/11/2011 |
| ST_6601_2012  | The Annual Growth Survey and the Joint Employment Report in the context of the European Semester Priorities for action in the areas of employment and social policies: political guidance in 2012 – Council Conclusions                                            | Council of the EU | 20/02/2012 |
| ST_11639_2012 | Responding to Demographic Challenges through enhanced participation in the labour market and society by all                                                                                                                                                        | Council of the EU | 22/06/2012 |
| ST_14426_2012 | Towards a job-rich recovery and giving a better chance to Europe's youth                                                                                                                                                                                           | Council of the EU | 05/10/2012 |
| ST_15652_2012 | Conclusions of the Council and of the Representatives of the Governments of the Member States, meeting within the Council, on the participation and social inclusion of young people with emphasis on those with a migrant background                              | Council of the EU | 13/11/2012 |
| ST_16617_2012 | Draft Council conclusions on the Single Market Act II – Together for new Growth                                                                                                                                                                                    | Council of the EU | 30/11/2012 |
| ST_17649_2012 | A Reinforced European Research Area Partnership for Excellence and Growth – Council conclusions                                                                                                                                                                    | Council of the EU | 12/12/2012 |
| ST_5101_2013  | Council conclusions on EU relations with EFTA countries                                                                                                                                                                                                            | Council of the EU | 08/01/2013 |
| ST_6936_2013  | The Annual Growth Survey and the Joint Employment Report in the context of the European Semester: political guidance on employment and social policies                                                                                                             | Council of the EU | 04/03/2013 |
| ST_15770_2013 | Draft Council conclusions on enhancing the social inclusion of young people not in employment, education or training                                                                                                                                               | Council of the EU | 14/11/2013 |
| ST_16783_2013 | Council conclusions on the EU Citizenship Report 2013                                                                                                                                                                                                              | Council of the EU | 25/11/2013 |
| ST_6626_2014  | Draft Council conclusions on Terrorism and Border Security                                                                                                                                                                                                         | Council of the EU | 02/03/2014 |

|               |                                                                                                                                                                  |                   |            |
|---------------|------------------------------------------------------------------------------------------------------------------------------------------------------------------|-------------------|------------|
| ST_7477_2014  | The 2014 Annual Growth Survey and Joint Employment Report: political guidance on employment and social policies                                                  | Council of the EU | 12/03/2014 |
| ST_9513_2014  | Draft Council conclusions on multilingualism and the development of language competences                                                                         | Council of the EU | 07/05/2014 |
| ST_15613_2014 | Draft Council conclusions on promoting young people's access to rights in order to foster their autonomy and participation in civil society                      | Council of the EU | 21/11/2014 |
| ST_16583_2014 | Council conclusions on a homogeneous extended single market and EU relations with Non-EU Western European countries                                              | Council of the EU | 16/12/2014 |
| ST_6147_2015  | The 2015 Annual Growth Survey and Joint Employment Report: political guidance on employment and social policies – Adoption of draft Council Conclusions          | Council of the EU | 24/02/2015 |
| ST_9351_2015  | Council conclusions on the European Research Area Roadmap 2015-2020                                                                                              | Council of the EU | 29/05/2015 |
| ST_14437_2015 | 2015 Joint Report of the Council and the Commission on the implementation of the renewed framework for European cooperation in the youth field (2010-2018)       | Council of the EU | 24/11/2015 |
| ST_15013_2016 | Measures to support early stage researchers, raise the attractiveness of scientific careers and foster investment in human potential in research and development | Council of the EU | 30/11/2016 |
| ST_15101_2016 | Council conclusions on a homogeneous extended single market and EU relations with Non-EU Western European countries                                              | Council of the EU | 14/12/2016 |
| ST_9048_2004  | BRUSSELS EUROPEAN COUNCIL 25 AND 26 MARCH 2004 PRESIDENCY CONCLUSIONS                                                                                            | European Council  | 19/05/2004 |
| ST_10679_2004 | BRUSSELS EUROPEAN COUNCIL 17 AND 18 JUNE 2004 PRESIDENCY CONCLUSIONS                                                                                             | European Council  | 19/07/2004 |
| ST_14292_2004 | BRUSSELS EUROPEAN COUNCIL 4/5 NOVEMBER 2004 PRESIDENCY CONCLUSIONS                                                                                               | European Council  | 08/12/2004 |
| ST_16238_2004 | BRUSSELS EUROPEAN COUNCIL 16/17 DECEMBER 2004 PRESIDENCY CONCLUSIONS                                                                                             | European Council  | 01/02/2005 |
| ST_7775_2006  | BRUSSELS EUROPEAN COUNCIL 23/24 MARCH 2006 PRESIDENCY CONCLUSIONS                                                                                                | European Council  | 18/05/2006 |
| ST_7224_2007  | BRUSSELS EUROPEAN COUNCIL 8/9 MARCH 2007 PRESIDENCY CONCLUSIONS                                                                                                  | European Council  | 02/05/2007 |
| ST_11177_2007 | BRUSSELS EUROPEAN COUNCIL 21/22 JUNE 2007 PRESIDENCY CONCLUSIONS                                                                                                 | European Council  | 20/07/2007 |
| ST_16616_2007 | BRUSSELS EUROPEAN COUNCIL 14 DECEMBER 2007 PRESIDENCY CONCLUSIONS                                                                                                | European Council  | 14/02/2008 |
| ST_7652_2008  | BRUSSELS EUROPEAN COUNCIL 13/14 MARCH 2008 PRESIDENCY CONCLUSIONS                                                                                                | European Council  | 20/05/2008 |



|                 |                                                                                                                                                            |                  |            |
|-----------------|------------------------------------------------------------------------------------------------------------------------------------------------------------|------------------|------------|
| ST_7880_2009    | BRUSSELS EUROPEAN COUNCIL 19/20 MARCH 2009 PRESIDENCY CONCLUSIONS                                                                                          | European Council | 29/04/2009 |
| ST_6_2009       | EUROPEAN COUNCIL 10/11 DECEMBER 2009 CONCLUSIONS                                                                                                           | European Council | 05/02/2010 |
| ST_2_2011       | EUROPEAN COUNCIL 4 FEBRUARY 2011 CONCLUSIONS                                                                                                               | European Council | 08/03/2011 |
| ST_23_2011      | EUROPEAN COUNCIL 23/24JUNE 2011 CONCLUSIONS                                                                                                                | European Council | 29/09/2011 |
| ST_4_2012       | EUROPEAN COUNCIL 1/2 March 2012 CONCLUSIONS                                                                                                                | European Council | 08/05/2012 |
| ST_76_2012      | EUROPEAN COUNCIL 28/29 JUNE 2012 CONCLUSIONS                                                                                                               | European Council | 29/06/2012 |
| ST_79_2014      | EUROPEAN COUNCIL 26/27 JUNE 2014 CONCLUSIONS                                                                                                               | European Council | 27/06/2014 |
| ST_28_2015      | European Council meeting (17 and 18 December 2015) – Conclusions                                                                                           | European Council | 18/12/2015 |
| ST_1_2016       | European Council meeting (18 and 19 February 2016) – Conclusions                                                                                           | European Council | 19/02/2016 |
| P6_TA(2005)0240 | European Parliament resolution on employment and productivity and their contribution to economic growth (2004/2188(INI))                                   | Parliament       | 09/06/2005 |
| PR 20051025     | MEPs debate Europe's social model and free movement of workers                                                                                             | Parliament       | 25/10/2005 |
| PR 20060214     | MEPs call on Member States to open their labour markets                                                                                                    | Parliament       | 14/02/2006 |
| P6_TA(2005)0152 | European Parliament resolution on modernising social protection and developing good quality healthcare (2004/2189(INI))                                    | Parliament       | 23/02/2006 |
| P6_TA(2006)0129 | European Parliament resolution on the transitional arrangements restricting the free movement of workers on EU labour markets (2006/2036(INI))             | Parliament       | 05/04/2006 |
| PR 20060405     | MEPs call for free access to EU15 labour market for new Member States                                                                                      | Parliament       | 05/04/2006 |
| P6_TA(2007)0339 | European Parliament resolution of 11th July 2007 on modernising labour law to meet the challenges of the 21st century (2007/2023(INI))                     | Parliament       | 11/07/2007 |
| PR 20071114     | MEPs congratulate nine new Members States for joining the Schengen area                                                                                    | Parliament       | 14/11/2007 |
| PR 20071115     | MEPs underline that free movement is a fundamental EU principle and call for support for Roma                                                              | Parliament       | 15/11/2007 |
| P6_TA(2007)0574 | European Parliament resolution of 29 November 2007 on Common Principles of Flexicurity (2007/2209(INI))                                                    | Parliament       | 29/11/2007 |
| P6_TA(2008)0494 | European Parliament resolution of 21 October 2008 on monitoring the application of Community law - 24th annual report from the Commission (2008/2046(INI)) | Parliament       | 21/10/2008 |
| P6_TA(2008)0624 | European Parliament resolution of 18 December 2008 on the European Job Mobility Action Plan (2007-2010) (2008/2098(INI))                                   | Parliament       | 18/12/2008 |

|                 |                                                                                                                                                                                                                                                                                                                                |            |            |
|-----------------|--------------------------------------------------------------------------------------------------------------------------------------------------------------------------------------------------------------------------------------------------------------------------------------------------------------------------------|------------|------------|
| P6_TA(2009)0019 | European Parliament resolution of 14 January 2009 on the situation of fundamental rights in the European Union 2004-2008 (2007/2145(INI))                                                                                                                                                                                      | Parliament | 14/01/2009 |
| PR 20090317     | Union citizenship and freedom of movement: MEPs slam Member States                                                                                                                                                                                                                                                             | Parliament | 17/03/2009 |
| P6_TA(2009)0204 | European Parliament resolution of 2 April 2009 on problems and prospects concerning European Citizenship (2008/2234(INI))                                                                                                                                                                                                      | Parliament | 02/04/2009 |
| PR 20101125     | Enforce human rights in the EU, urges Civil Liberties Committee                                                                                                                                                                                                                                                                | Parliament | 25/11/2010 |
| P7_TA(2010)0483 | European Parliament resolution of 15 December 2010 on the situation of fundamental rights in the European Union (2009) – effective implementation after the entry into force of the Treaty of Lisbon (2009/2161(INI))                                                                                                          | Parliament | 15/12/2010 |
| PR 20101215     | Fundamental rights in the EU: more needs to be done                                                                                                                                                                                                                                                                            | Parliament | 15/12/2010 |
| P7_TA(2011)0058 | European Parliament resolution of 16 February 2011 on 'Towards adequate, sustainable and safe European pension systems' (2010/2239(INI))                                                                                                                                                                                       | Parliament | 16/02/2011 |
| P7_TA(2011)0144 | European Parliament resolution of 6 April 2011 on Governance and Partnership in the Single Market (2010/2289(INI))                                                                                                                                                                                                             | Parliament | 06/04/2011 |
| P7_TA(2011)0455 | European Parliament resolution of 25 October 2011 on promoting workers' mobility within the European Union (2010/2273(INI))                                                                                                                                                                                                    | Parliament | 25/10/2011 |
| PR 20111025     | Opening up EU labour markets to Bulgarian and Romanian citizens                                                                                                                                                                                                                                                                | Parliament | 25/10/2011 |
| P7_TA(2011)0490 | European Parliament legislative resolution of 25 February 2016 on the proposal for a regulation of the European Parliament and of the Council on a European network of Employment Services, workers' access to mobility services and the further integration of labour markets (COM(2014)0006 – C7-0015/2014 – 2014/0002(COD)) | Parliament | 15/11/2011 |
| P7_TA(2011)0587 | European Parliament resolution of 15 December 2011 on freedom of movement for workers within the European Union                                                                                                                                                                                                                | Parliament | 15/12/2011 |
| PR 20111215     | Parliament reiterates its call to open EU labour markets to Bulgarians and Romanians                                                                                                                                                                                                                                           | Parliament | 15/12/2011 |
| PR 20120329     | Remove obstacles to EU citizens' rights, say MEPs                                                                                                                                                                                                                                                                              | Parliament | 29/03/2012 |
| PR 20120410     | Removing obstacles to Europeans' freedom of movement                                                                                                                                                                                                                                                                           | Parliament | 10/04/2012 |
| PR 20100608     | EP hits out over tactic to exclude MEPs from Schengen decision                                                                                                                                                                                                                                                                 | Parliament | 08/06/2012 |
| PR 20120614     | Schengen: MEPs raise concerns over threat to freedom of movement                                                                                                                                                                                                                                                               | Parliament | 14/06/2012 |
| P7_TA(2012)0500 | European Parliament resolution of 12 December 2012 on the situation of fundamental rights in the European Union (2010 - 2011) (2011/2069(INI))                                                                                                                                                                                 | Parliament | 12/12/2012 |
| P7_TA(2013)0054 | European Parliament resolution of 7 February 2013 with recommendations to the Commission on the governance of the Single Market (2012/2260(INL))                                                                                                                                                                               | Parliament | 07/02/2013 |
| P7_TA(2013)0053 | European Parliament resolution of 7 February 2013 on the European Semester for economic policy coordination: employment and social aspects in the Annual Growth Survey 2013 (2012/2257(INI))                                                                                                                                   | Parliament | 07/02/2013 |
| PR 20130530     | Schengen reform: Parliament and Council negotiators strike a deal                                                                                                                                                                                                                                                              | Parliament | 30/05/2013 |
| PR 20130612     | European Parliament backs Schengen reform deal                                                                                                                                                                                                                                                                                 | Parliament | 12/06/2013 |

|                 |                                                                                                                                                                                                                                                                                                                      |            |            |
|-----------------|----------------------------------------------------------------------------------------------------------------------------------------------------------------------------------------------------------------------------------------------------------------------------------------------------------------------|------------|------------|
| PR 20130619     | Freedom of movement: why Parliament acted to preserve the EU's biggest achievement                                                                                                                                                                                                                                   | Parliament | 19/06/2013 |
| PR 20131010     | Petition: social issues, civil rights and environment top EU citizens' concerns                                                                                                                                                                                                                                      | Parliament | 10/10/2013 |
| PR 20131106     | Employment MEPs boost freedom of movement for workers throughout the EU                                                                                                                                                                                                                                              | Parliament | 06/11/2013 |
| PR 20140115     | EU countries must respect the right to free movement, say MEPs                                                                                                                                                                                                                                                       | Parliament | 15/01/2014 |
| PR 20150115     | "Self-employment should not be used as a means to bypass social security laws"                                                                                                                                                                                                                                       | Parliament | 15/01/2014 |
| P7_TA(2014)0037 | European Parliament resolution of 16 January 2014 on respect for the fundamental right of free movement in the EU                                                                                                                                                                                                    | Parliament | 16/01/2014 |
| PR 20140116     | EU citizenship should not be for sale at any price, says European Parliament                                                                                                                                                                                                                                         | Parliament | 16/01/2014 |
| PR 20140210     | Schulz: Switzerland faces many negotiations if it limits freedom of movement                                                                                                                                                                                                                                         | Parliament | 10/02/2014 |
| PR 20140225     | EU cannot accept cherry-picking by Switzerland                                                                                                                                                                                                                                                                       | Parliament | 25/02/2014 |
| P7_TA(2014)0173 | European Parliament resolution of 27 February 2014 on the situation of fundamental rights in the European Union (2012) (2013/2078(INI))                                                                                                                                                                              | Parliament | 27/02/2014 |
| P7_TA(2014)0233 | European Parliament resolution of 12 March 2014 on the EU Citizenship Report 2013. EU citizens: your rights, your future (2013/2186(INI))                                                                                                                                                                            | Parliament | 12/03/2014 |
| PR 20140415     | EU workers to enjoy fully portable pension rights when moving abroad                                                                                                                                                                                                                                                 | Parliament | 15/04/2014 |
| P8_TA(2014)0038 | European Parliament resolution of 22 October 2014 on the European Semester for economic policy coordination: implementation of 2014 priorities (2014/2059(INI))                                                                                                                                                      | Parliament | 22/10/2014 |
| P8_TA(2015)0067 | European Parliament resolution of 11 March 2015 on the European Semester for economic policy coordination: Annual Growth Survey 2015 (2014/2221(INI))                                                                                                                                                                | Parliament | 11/03/2015 |
| P8_TA(2015)0286 | European Parliament resolution of 8 September 2015 on the situation of fundamental rights in the European Union (2013-2014) (2014/2254(INI))                                                                                                                                                                         | Parliament | 08/09/2015 |
| P8_TA(2015)0313 | European Parliament resolution of 9 September 2015 on EEA-Switzerland: Obstacles with regard to the full implementation of the internal market (2015/2061(INI))                                                                                                                                                      | Parliament | 09/09/2015 |
| P8_TA(2015)0321 | European Parliament resolution of 10 September 2015 on creating a competitive EU labour market for the 21st century: matching skills and qualifications with demand and job opportunities, as a way to recover from the crisis (2014/2235(INI))                                                                      | Parliament | 10/09/2015 |
| P8_TA(2015)0322 | European Parliament resolution of 10 September 2015 on the 30th and 31st annual reports on monitoring the application of EU Law (2012-2013) (2014/2253(INI))                                                                                                                                                         | Parliament | 10/09/2015 |
| P8_TA(2015)0351 | European Parliament resolution of 8 October 2015 on the application of Directive 2006/54/EC of the European Parliament and of the Council of 5 July 2006 on the implementation of the principle of equal opportunities and equal treatment of men and women in matters of employment and occupation (2014/2160(INI)) | Parliament | 08/10/2015 |
| PR 20151203     | President Schulz: We need a common foreign and security policy                                                                                                                                                                                                                                                       | Parliament | 03/12/2015 |
| PR 20160203     | UK in the EU: MEPs debate proposed reform ahead of referendum                                                                                                                                                                                                                                                        | Parliament | 03/02/2016 |

|                          |                                                                                                                                                                                                                                                                                                                                |            |            |
|--------------------------|--------------------------------------------------------------------------------------------------------------------------------------------------------------------------------------------------------------------------------------------------------------------------------------------------------------------------------|------------|------------|
| PR 20160224              | Eures network: helping people to find a job in another EU country                                                                                                                                                                                                                                                              | Parliament | 24/02/2016 |
| P8_TA(2016)0055          | European Parliament legislative resolution of 25 February 2016 on the proposal for a regulation of the European Parliament and of the Council on a European network of Employment Services, workers' access to mobility services and the further integration of labour markets (COM(2014)0006 – C7-0015/2014 – 2014/0002(COD)) | Parliament | 25/02/2016 |
| P8_TA(2016)0058          | European Parliament resolution of 25 February 2016 on the European Semester for economic policy coordination: Annual Growth Survey 2016 (2015/2285(INI))                                                                                                                                                                       | Parliament | 25/02/2016 |
| P8_TA(2016)0059          | European Parliament resolution of 25 February 2016 on European Semester for economic policy coordination: Employment and Social Aspects in the Annual Growth Survey 2016 (2015/2330(INI))                                                                                                                                      | Parliament | 25/02/2016 |
| P8_TA(2016)0346          | European Parliament resolution of 14 September 2016 on social dumping in the European Union (2015/2255(INI))                                                                                                                                                                                                                   | Parliament | 14/09/2016 |
| P8_TA(2016)0416          | European Parliament resolution of 26 October 2016 on the European Semester for economic policy coordination: implementation of 2016 priorities (2016/2101(INI))                                                                                                                                                                | Parliament | 26/10/2016 |
| P8_TA_PROV<br>(2016)0485 | European Parliament resolution of 13 December 2016 on the situation of fundamental rights in the European Union in 2015 (2016/2009(INI))                                                                                                                                                                                       | Parliament | 13/12/2016 |
